# Supplementary material for: The Anticancer Activities of Natural Terpenoids That Inhibit Both Melanoma and Non-Melanoma Skin Cancers
Source: MDPI journal article supplement (doi:10.3390/ijms25084423), 2024-04-17
Supplement: s1 [file s1]

Supplementary material for:

*Review*

# **The Anticancer Activities of Natural Terpenoids That Inhibit Both Melanoma and Non-Melanoma Skin Cancers**

**Ye Eun Yoon <sup>1,\*</sup>, Young Jae Jung <sup>1</sup> and Sung-Joon Lee <sup>2,3,\*</sup>**

<sup>1</sup> Department of Biotechnology, Graduate School of Life Sciences and Biotechnology, College of Life Sciences and Biotechnology, Korea University, Seoul 02855, Republic of Korea; lyjung51@korea.ac.kr

<sup>2</sup> Department of Food Bioscience and Technology, College of Life Sciences and Biotechnology, Korea University, Seoul 02855, Republic of Korea

<sup>3</sup> Interdisciplinary Program in Precision Public Health, BK21 Four Institute of Precision Public Health, Korea University, Seoul 02846, Republic of Korea

\* Correspondence: yeeun916@korea.ac.kr (Y.E.Y.); junelee@korea.ac.kr (S.-J.L.)

**Table S1.** List of abbreviations

|                |                                                  |
|----------------|--------------------------------------------------|
| <b>AhR</b>     | aryl hydrocarbon receptor                        |
| <b>ALT</b>     | alanine aminotransferase                         |
| <b>AST</b>     | aspartate aminotransferase                       |
| <b>BCC</b>     | basal cell carcinoma                             |
| <b>CMM</b>     | cutaneous malignant melanoma                     |
| <b>COX-2</b>   | cyclooxygenase-2                                 |
| <b>DMBA</b>    | 7, 12-dimethylbenz[a]anthracene                  |
| <b>EMT</b>     | epithelial to mesenchymal transition             |
| <b>5-FU</b>    | 5-fluorouracil                                   |
| <b>GM-CSF</b>  | granulocyte-macrophage colony-stimulating factor |
| <b>GST</b>     | glutathione-S-transferase                        |
| <b>HMG-CoA</b> | 3-hydroxy-3-methylglutaryl coenzyme A            |
| <b>HO-1</b>    | heme oxygenase-1                                 |
| <b>LOX5</b>    | lipoxygenase-5                                   |
| <b>LVEF</b>    | left ventricular ejection fraction               |
| <b>NMSC</b>    | non-melanoma skin cancer                         |
| <b>NQO1</b>    | NAD(P)H:quinone oxidoreductase 1                 |
| <b>Nrf2</b>    | nuclear factor E2-related factor 2               |
| <b>PCNA</b>    | proliferating cell nuclear antigen               |
| <b>PGE2</b>    | prostaglandin E2                                 |
| <b>PKC</b>     | protein kinase C                                 |
| <b>ROS</b>     | reactive oxygen species                          |
| <b>SCC</b>     | squamous cell carcinoma                          |
| <b>TPA</b>     | 12-O-tetradecanoylphorbol-13-acetate             |
| <b>UA</b>      | ursolic acid                                     |
| <b>UGT</b>     | uridine 5'-diphospho-glucuronosyltransferase     |
| <b>UV</b>      | ultra violet                                     |
